# Supplementary material for: A budget impact analysis of a powered hybrid mattress to prevent pressure ulcers in the Austrian inpatient setting: An original research
Source: PubMed Central journal article supplement — Health Sci Rep. 2024 Feb 23;7(2):e1887. doi: 10.1002/hsr2.1887 (PMC10885175; doi:10.1002/hsr2.1887), 2024-02-23
Supplement: HSR2-7-e1887-s001.pdf [file HSR2-7-e1887-s001.pdf]

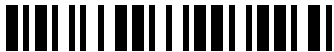

**Dear employees,**

**The following survey is intended to provide a direct comparison of the benefits between the hybrid mattress (Dyna-Form® Mercury Advance) and the low-air mattress (Arjo TheraKair Visio®). Since you are currently no longer using the low-air mattress, we would like to politely ask you to answer the relevant questions from memory. Only if information is available for both mattresses can a comparison be made.**

**The questionnaire you fill out is automatically anonymized by the system, so that no conclusions can be drawn about your person. We would like to ask you to take approximately 10 minutes to complete this questionnaire, as incomplete questionnaires cannot be evaluated.**

**Thank you very much for your support!**

**Part A: General**

**A1. In which of the following station(s) do you work?**

- Medical Department East
- Medical Department West
- Orthopedics East
- Interdisciplinary Intensive Care Department
- Combination Department North

**A2. Sex:**

- Female
- Male

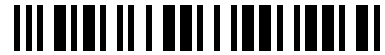

**A3. Please select the age group that applies to you:**

- 20-25 years
- 25-30 years
- 30-35 years
- 35-40 years
- 40-45 years
- 45-50 years
- 50-55 years
- 55-60 years
- 60-65 years

**A4. Which of the following nursing professions do you belong to?**

- Graduated health care and nursing service
- Specialized nursing assistant
- Nursing assistant

## **Part B: Inpatient admission: Low-air mattress**

**B1. How long did the decision for the low-air mattress (Arjo TheraKair Visio) take on average per patient at risk of pressure ulcers? Please enter the time needed for decision as a numerical value in minutes:**

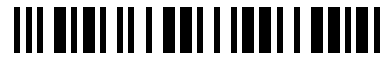

## **Part C: Inpatient Admission: Hybrid Mattress**

- C1. How long did the decision for the Hybrid mattress (Dyna-Form Mercury Advance) take on average per patient at risk of pressure ulcers? Please enter the time needed for decision as a numerical value in minutes:**

## **Part D: Repositioning: Low-Air Mattress**

- D1. How often did a patient on the low-air mattress (Arjo TheraKair Visio) must be repositioned on average per day? Please enter the required number (as a numerical value):**

- D2. How many formal caregivers were needed on average for a patient repositioning on the low-air mattress (Arjo TheraKair Visio)? Please enter the number of people required:**

- D3. How long did it take on average to reposition each patient on the low-air mattress (Arjo TheraKair Visio)? Please enter this as a numerical value in minutes:**

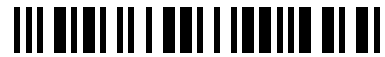

## **Part E: Repositioning: Hybrid Mattress**

- E1. What is the average number of times a patient needs to be repositioned on the hybrid mattress (Dyna-Form Mercury Advance) per day? Please enter the required number (as a numerical value):**

- E2. What is the average number of formal caregivers needed for a patient repositioning on the hybrid mattress (Dyna-Form Mercury Advance)? Please enter the number of people required as a numerical value:**

- E3. How long does it take on average to reposition each patient on the hybrid mattress (Dyna-Form Mercury Advance)? Please enter this as a numerical value in minutes:**

## **Part F: Cleaning: Low-Air Mattress**

- F1. How often were the low-air mattresses (Arjo TheraKair Visio) cleaned and disinfected on average per week? Please enter the number as a numerical value:**

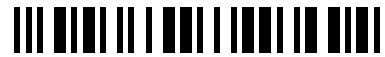

**F2. On average, how many people were involved in this cleaning process of the low-air mattress (Arjo TheraKair Visio)? Please enter the number of people required as a numerical value:**

**F3. How much time did the cleaning process take for the low-air mattress (Arjo TheraKair Visio)? Please enter this as a numerical value in minutes:**

### **Part G: Cleaning: Hybrid Mattress**

**G1. How often are the hybrid mattresses (Dyna-Form Mercury Advance) cleaned and disinfected on average per week? Please enter the number as a numerical value:**

**G2. On average, how many people are involved in the cleaning process of the hybrid mattresses (Dyna-Form Mercury Advance)? Please enter the number of persons required:**

**G3. How long does the cleaning process take for the hybrid mattress (Dyna-Form Mercury Advance)? Please enter this as a numerical value in minutes:**



## Part H: Documentation: Low-Air Mattress

- H1. How often do you usually carry out patient documentation per day on the low-air mattress (Arjo TheraKair Visio)?**  
Please enter the average number as a numerical value:

- H2. How long does patient documentation (including repositioning activities) take on average for the low-air mattress (Arjo TheraKair Visio)?**  
Please enter the time required as a numerical value in minutes:

## Part I: Documentation: Hybrid Mattress

- I1. How often do you usually carry out patient documentation per day for the hybrid mattress (Dyna-Form Mercury Advance)?**  
Please enter the average number as a numerical value:

- I2. How long does patient-related documentation take (incl. Repositioning activities) with the hybrid mattress (Dyna-Form Mercury Advance) on average?**  
Please enter the required time as a numerical value in minutes:

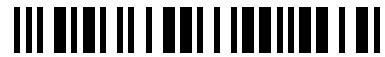

## **Part J: Discharge: Low-Air Mattress**

**J1. What was the average time spent on the low-air mattress (Arjo TheraKair Visio) per patient? Please enter the number of days:**

## **Part K: Discharge: Hybrid Mattress**

**K1. What is the average time spent per patient on the hybrid mattress (Dyna-Form Mercury Advance)? Please enter the number of days:**

**You have completed the survey. Thank you very much for your participation!**
